# Supplementary material for: Fluctuating Nonlinear Spring Model of Mechanical Deformation of Biological Particles
Source: PubMed Central journal article supplement (PMC4731076; doi:10.1371/journal.pcbi.1004729), 2016-01-28
Supplement: pcbi.1004729.s001.pdf [file pcbi.1004729.s001.pdf]

## Text S1. Self Organized Polymer (SOP) model of a virus particle.

Olga Kononova<sup>1,2</sup>, Joost Snijder<sup>3</sup>, Yaroslav Kholodov<sup>2,4</sup>, Kenneth A. Marx<sup>1</sup>, Gijs J. L. Wuite<sup>3</sup>, Wouter H. Roos<sup>3,\*</sup>, Valeri Barsegov<sup>1,2,\*</sup>.

**1 Department of Chemistry, University of Massachusetts, Lowell, MA 01854, USA**

**2 Moscow Institute of Physics and Technology, Moscow Region, 141700, Russia**

**3 Natuur- en Sterrenkunde and LaserLab, Vrije Universiteit, 1081 HV Amsterdam, The Netherlands**

**4 Institute of Computer Aided Design Russian Academy of Science, Moscow, 123056, Russia**

The SOP model of the polypeptide chain was originally designed to address the mechanical properties of proteins (see Refs. [24, 25, 36, 37] the main text). The model has been applied to a variety of biological systems [1–3] and Refs. [15] in main text. In this work, the SOP model has been used to describe each protein subunit forming a virus capsid.

In the topology-based SOP model (Fig. S5), each amino acid residue is represented by a single interaction center described by the  $C_\alpha$ -atom, and the protein backbone is represented by a collection of the  $C_\alpha$ - $C_\alpha$  covalent bonds with the peptide bond length distance of  $a = 3.8 \text{ \AA}$ . The potential energy function  $U_{SOP}$  specified in terms of the coordinates of the  $C_\alpha$ -atoms  $\{r_i\} = r_1, r_2, \dots, r_M$  ( $M$  is the total number of residues) is given by:

$$U_{SOP} = U_{FENE} + U_{NB}^{ATT} + U_{NB}^{REP} \quad (\text{S1})$$

In Eq.(S1), the first term is the finite extensible nonlinear elastic (FENE) potential:

$$U_{FENE} = - \sum_{i=1}^{M-1} \frac{kR_0}{2} \log \left( 1 - \frac{(r_{i,i+1} - r_{i,i+1}^0)^2}{R_0^2} \right) \quad (\text{S2})$$

where  $k=14 \text{ N/m}$  is the spring constant, and the tolerance in the change of the covalent bond distance is  $R_0=2 \text{ \AA}$ . The FENE potential describes the backbone chain connectivity. The distance between the next-neighbor residues  $i$  and  $i+1$ , is  $r_{i,i+1}$ , and  $r_{i,i+1}^0$  is its value in the native structure. To account for the non-covalent (non-bonded) interactions that stabilize the native state, we use the Lennard-Jones potential:

$$U_{NB}^{ATT} = \sum_{i,j=i+3}^{M-3} \varepsilon_h \left[ \left( \frac{r_{ij}^0}{r_{ij}} \right)^{12} - 2 \left( \frac{r_{ij}^0}{r_{ij}} \right)^6 \right] \Delta_{ij} \quad (\text{S3})$$

In Eq.(S3), we assume that if the non-covalently linked residues  $i$  and  $j$  ( $|i-j| > 2$ ) are within the cut-off distance of  $8 \text{ \AA}$  in the native state, then  $\Delta_{ij} = 1$ ;  $\Delta_{ij} = 0$  otherwise. The value of  $\varepsilon_h$  quantifies the strength of the non-bonded interactions. The non-native (non-bonded) interactions are treated as repulsive:

$$U_{NB}^{REP} = \sum_{i,j=i+2}^{M-2} \varepsilon_r \left( \frac{\sigma_r}{r_{ij}} \right)^6 + \sum_{i,j=i+3}^{M-3} \varepsilon_r \left( \frac{\sigma_r}{r_{ij}} \right)^6 (1 - \Delta_{ij}) \quad (\text{S4})$$

In Eq.(S4), a constraint is imposed on the bond angle between the residues  $i$ ,  $i + 1$ , and  $i + 2$  by including the repulsive potential with parameters  $\varepsilon_l = 1$  kcal/mol and  $\sigma_l = 3.8$  Å. These define the strength and the range of the repulsion. In the SOP model, parameter  $\varepsilon_h$  sets the energy scale. This parameter is estimated based on the results of all-atom MD simulations of the virus particle at equilibrium.

The dynamics of the virus system is obtained by solving numerically the Langevin equations of motion for each particle position  $r_i$  in the over-damped limit:

$$\eta \frac{dr_i}{dt} = -\frac{\partial U_i(r_i)}{\partial r_i} + g_i(t) \quad (\text{S5})$$

In Eq.(S5),  $U_i(r_i)$  is the total potential energy, which accounts for the biomolecular interactions ( $U_{SOP}$ ) and interactions of particles with the indenting object — spherical tip ( $U_{tip}$ ; see Eq.(16) in main text). Also, in Eq.(S5)  $g_i(t)$  is the Gaussian distributed zero-average random force, and  $\eta$  is the friction coefficient. To generate the Brownian dynamics, the equations of motion for each  $C_\alpha$ -atom are propagated with the time step  $\Delta t = 0.08\tau_H$ , where  $\tau_H = \zeta\varepsilon_h\tau_L/k_B T$  ( $\Delta t = 20$  ps for CCMV). Here,  $\tau_L = (ma^2/\varepsilon_h)^{1/2} = 3$  ps,  $\zeta = 50.0$  is the dimensionless friction constant for an amino acid residue in water ( $\eta = \zeta m/\tau_L$ ),  $m \approx 3 \times 10^{22}$  g is the residue mass, and  $T$  is the absolute temperature [4,5]. To perform simulations of nanoindentation of a virus particle, we set  $T$  to room temperature and use the bulk water viscosity, which corresponds to the friction coefficient  $\eta = 7.0 \times 10^5$  pN ps/nm.

## References

- [1] Zhang Z, Thirumalai D. Dissecting the kinematics of the kinesin step. *Structure*. 2012;20:628–640.
- [2] Hyeon C, Onuchic JN. Mechanical control of the directional stepping dynamics of the kinesin motor. *Proc Natl Acad Sci USA*. 2007;104:17382–17387.
- [3] Zhmurov A, Brown AEX, Litvinov RI, Dima RI, Weisel JW, Barsegov V. Mechanism of fibrin(ogen) forced unfolding. *Structure*. 2011;19(11):1615–1624.
- [4] Barsegov V, Klimov D, Thirumalai D. Mapping the energy landscape of biomolecules using single molecule force correlation spectroscopy: Theory and applications. *Biophys J*. 2006;90:3827–3841.
- [5] Zhmurov A, Dima RI, Barsegov V. Order statistics theory of unfolding of multimeric proteins. *Biophys J*. 2010;99(6):1959–1968.
