# Supplementary material for: Fluctuating Nonlinear Spring Model of Mechanical Deformation of Biological Particles
Source: PubMed Central journal article supplement (PMC4731076; doi:10.1371/journal.pcbi.1004729), 2016-01-28
Supplement: pcbi.1004729.s003.pdf [file pcbi.1004729.s003.pdf]

## Text S3. Estimation of the thickness of TrV and AdV with encapsulated genome.

Olga Kononova<sup>1,2</sup>, Joost Snijder<sup>3</sup>, Yaroslav Kholodov<sup>2,4</sup>, Kenneth A. Marx<sup>1</sup>, Gijs J. L. Wuite<sup>3</sup>, Wouter H. Roos<sup>3,\*</sup>, Valeri Barsegov<sup>1,2,\*</sup>.

**1 Department of Chemistry, University of Massachusetts, Lowell, MA 01854, USA**

**2 Moscow Institute of Physics and Technology, Moscow Region, 141700, Russia**

**3 Natuur- en Sterrenkunde and LaserLab, Vrije Universiteit, 1081 HV Amsterdam, The Netherlands**

**4 Institute of Computer Aided Design Russian Academy of Science, Moscow, 123056, Russia**

When a virus particle is empty (i.e. it does not contain genomic material) the thickness of the beams is equal to the virus shell thickness. The capsid thickness with encapsulated genome due to DNA/RNA packing can be estimated assuming that DNA/RNA molecules are evenly distributed on the inner capsid surface. The volume occupied by the genome considered to form a long cylindrical tube is given by  $V_{gen} = \pi R_{gen}^2 L_{gen}$ , where  $L_{gen}$  is the genome length and  $R_{gen} = 1.0$  nm and  $0.5$  nm is the radius of cross-sectional area of the dsDNA molecule (for AdV) and ssRNA molecule (for TrV), respectively. The inner volume of the virus particle,  $V_{in} = V_{gen} + V_{emp}$ , is the sum of the volume occupied by the genome ( $V_{gen}$ ) and the volume of the empty space ( $V_{emp}$ ). Here,  $V_{in} = 4/3\pi R_{in}^3$  and  $V_{emp} = 4/3\pi(R_{in} - r_{gen})^3$ , where  $R_{in} = R_{par} - r$  is the inner radius of the particle shell,  $r$  is the shell thickness, and  $r_{gen}$  is the increase in shell thickness due to encapsulated genome. This allows us to express  $r_{gen}$  as  $r_{gen} = R_{in} - (R_{in}^3 - 3/4 R_{gen}^2 L_{gen})^{1/3}$ . For the AdV shell,  $R_{in} = 36$  nm and  $L_{gen} = 12$   $\mu\text{m}$  [1]; hence,  $r_{gen} = 2.5$  nm. For the TrV shell,  $R_{in} = 11$  nm and  $L_{gen} = 3.06$   $\mu\text{m}$  (Ref. [12] in main text); hence,  $r_{gen} = 1.9$  nm. These values of  $r_{gen}$  for AdV and TrV shells were used to estimate  $E_b$  (Table 1 in main text).

## References

- [1] San Martin C. Latest insights on Adenovirus structure and assembly. *Viruses*. 2012;4:847.
